# Supplementary material
Source: MDPI journal article supplement (https://www.mdpi.com/2073-4441/11/6/1175)
Supplement: s1 [file s1]

## Supplementary file

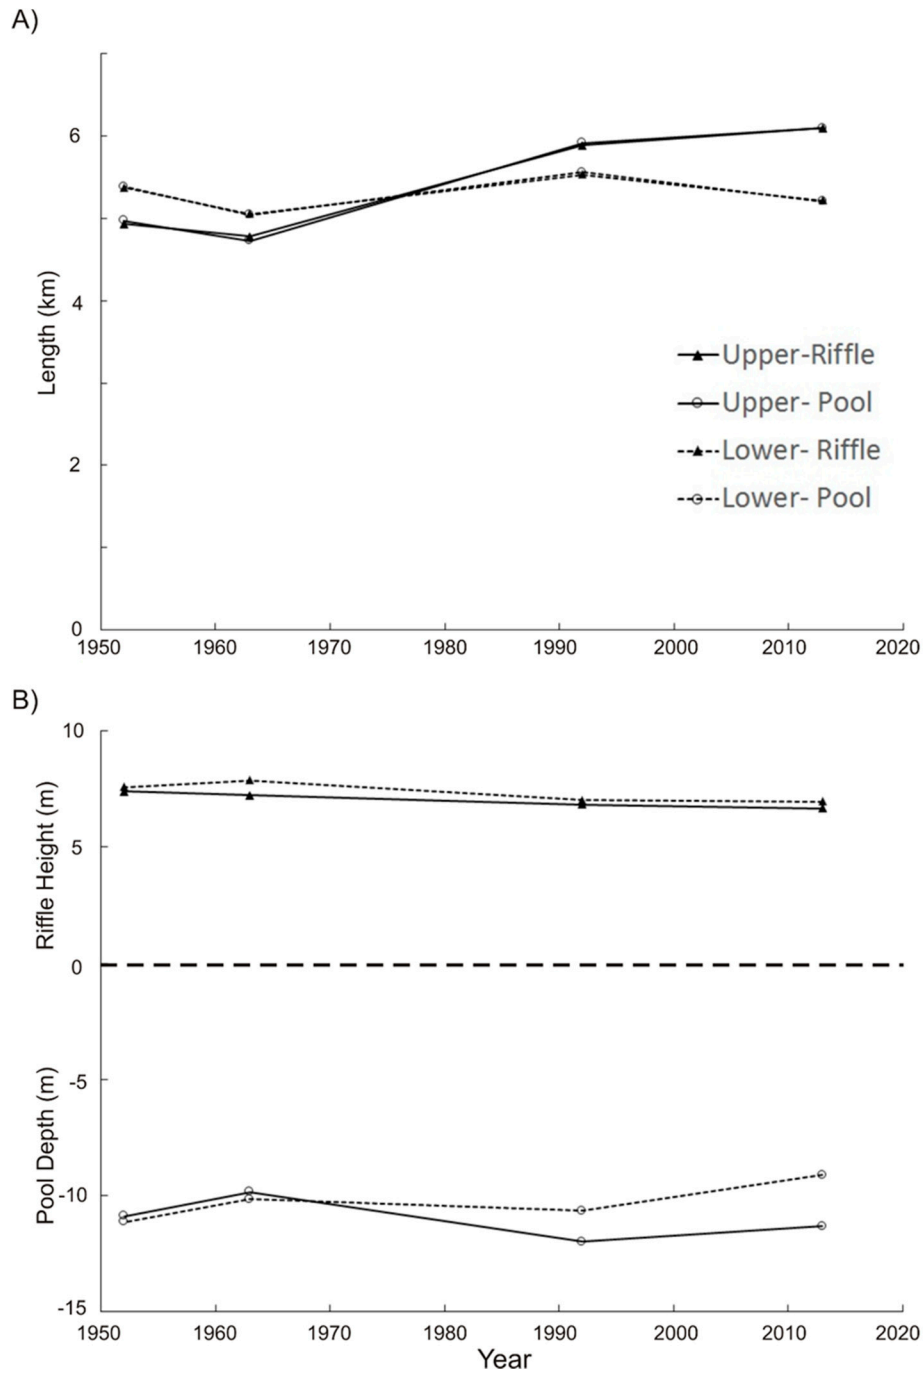

**Figure S1.** Temporal trends of lengths between pools or riffles (A) and amplitude (B) in both the upper and the lower reaches. The amplitude values in (B) are separated by riffle height and pool depth with a y-axis of 0 in between. Note that solid lines represent the upper reach; while dashed lines represent the lower reach. In addition, solid triangles represent riffles, and opened circles represent pools.
